# Supplementary material for: Male professional rugby players with hamstring/quadriceps muscle imbalance have an increased risk of hamstring injuries during the season
Source: Research Square preprint supplement (doi:10.21203/rs.3.rs-6445849/v1), 2025-05-20
Supplement: Supplementary file 1 [file cd902be8c1c436f57479cf5b.docx]

**Injury history form**

**Remote from the knee (from the foot up to the lumbar spine)**

Anonymized Number: I__I - I__I__I__I__I

For each previous injury, please describe:

- The nature and location of the lesion (specify side):______________________________________
- Circumstances of the injury:________________________________________________________________
- Time since the injury occurred: ____________________________________________________________
- Duration of sports unavailability: __________________________________________________________

Injury History 1:

- ______________________________________________________________________________________________
- ______________________________________________________________________________________________
- ______________________________________________________________________________________________
- ______________________________________________________________________________________________

Injury History 2:

- ______________________________________________________________________________________________
- ______________________________________________________________________________________________
- ______________________________________________________________________________________________
- ______________________________________________________________________________________________

Injury History 3:

- ______________________________________________________________________________________________
- ______________________________________________________________________________________________
- ______________________________________________________________________________________________
- ______________________________________________________________________________________________

Injury History 4:

- ______________________________________________________________________________________________
- ______________________________________________________________________________________________
- ______________________________________________________________________________________________
- ______________________________________________________________________________________________

**Injury history form (knee region)**

Anonymized Number: |__| - |__|__|__|__|

**Injury Record 1**:

□ Muscle injury

Specify the muscle: □ Hamstrings □ Quadriceps

Side: □ Right □ Left

Type of injury: □ Intrinsic □ Extrinsic

Date of injury: _________________________________________

Recurrence? □ No □ Yes – Date of most recent recurrence:

Time off sport: □ 2 weeks < “Duration” < 4 weeks

□ 4 weeks < “Duration” < 6 weeks

□ “Duration” ≥ 6 weeks

□ Tendon injury – specify the tendon:

□ Tendinopathy Tendon rupture: □ Partial □ Complete

Ligament injury – specify the ligament:

□ ACL □ PCL □ MCL □ LCL

□ Sprain Rupture: □ Partial □ Complete

Other injuries – specify:_________________________________________________________________________

**What treatments were used**?

□ Physical therapy □ Surgery

**Was isokinetic testing used in rehabilitation?** □ Yes □ No

**How does the player rate their current functional recovery?**

□ Very good □ Good □ Average □ Poor

**If recovery is average or unsatisfactory, what symptoms persist?**__________________________________________________________________________________________________________________________________________________________________________________________________________________________________________________________________________________________________________________

**Injury Record 2:**

□ Muscle injury

Specify the muscle: □ Hamstrings □ Quadriceps

Side: □ Right □ Left

Type of injury: □ Intrinsic □ Extrinsic

Date of injury: _________________________________________

Recurrence? □ No □ Yes – Date of most recent recurrence:

Time off sport: □ 2 weeks < “Duration” < 4 weeks

□ 4 weeks < “Duration” < 6 weeks

□ “Duration” ≥ 6 weeks

□ Tendon injury – specify the tendon:

□ Tendinopathy Tendon rupture: □ Partial □ Complete

Ligament injury – specify the ligament:

□ ACL □ PCL □ MCL □ LCL

□ Sprain Rupture: □ Partial □ Complete

Other injuries – specify:_________________________________________________________________________

**What treatments were used**?

□ Physical therapy □ Surgery

**Was isokinetic testing used in rehabilitation?** □ Yes □ No

**How does the player rate their current functional recovery?**

□ Very good □ Good □ Average □ Poor

**If recovery is average or unsatisfactory, what symptoms persist?**__________________________________________________________________________________________________________________________________________________________________________________________________________________________________________________________________________________________________________________

**Injury Record 3:**

□ Muscle injury

Specify the muscle: □ Hamstrings □ Quadriceps

Side: □ Right □ Left

Type of injury: □ Intrinsic □ Extrinsic

Date of injury: _________________________________________

Recurrence? □ No □ Yes – Date of most recent recurrence:

Time off sport: □ 2 weeks < “Duration” < 4 weeks

□ 4 weeks < “Duration” < 6 weeks

□ “Duration” ≥ 6 weeks

□ Tendon injury – specify the tendon:

□ Tendinopathy Tendon rupture: □ Partial □ Complete

Ligament injury – specify the ligament:

□ ACL □ PCL □ MCL □ LCL

□ Sprain Rupture: □ Partial □ Complete

Other injuries – specify:_________________________________________________________________________

**What treatments were used**?

□ Physical therapy □ Surgery

**Was isokinetic testing used in rehabilitation?** □ Yes □ No

**How does the player rate their current functional recovery?**

□ Very good □ Good □ Average □ Poor

**If recovery is average or unsatisfactory, what symptoms persist?**__________________________________________________________________________________________________________________________________________________________________________________________________________________________________________________________________________________________________________________

**DATA COLLECTION**

**(History, FLEXIBILITY, ISOKINETIC TESTS)**

Anonymized number: I__I - I__I__I__I__I

Weight: _________ Kg

Height: __________ cm

Position (for front row, specify Right, Left or both): ______________________________________________

1. Previous injuries:

- Near the knee (list only the lesion; detailed description on the nearby knee injury sheet).
  - _____________________________________________________________________________________
  - _____________________________________________________________________________________
  - _____________________________________________________________________________________
  - _____________________________________________________________________________________
- Remote from the knee (list only the lesion; detailed description on the remote knee injury sheet).
  - _____________________________________________________________________________________
  - _____________________________________________________________________________________
  - _____________________________________________________________________________________
  - _____________________________________________________________________________________

1. Flexibility

|  | Left side | Right side |
| --- | --- | --- |
| Hip flexion, knee extended (in degrees) (Hamstrings) |  |  |
| Heel-to-buttock distance (in cm) (Quadriceps) |  |  |
| Knee flexion angle in prone position (Quadriceps) |  |  |

1. Isokinetic tests

Please specify the type of isokinetic device used:_________________________________________________

**Prospective injury collection near the knee**

Anonymized number: I__I - I__I__I__I__I

**Nature of the lesion (location and severity)?**

🞎 Muscle injury – specify the muscle:

🞎 Hamstrings 🞎 Quadriceps

Side: 🞎 Right 🞎 Left

Type of injury: 🞎Intrinsic 🞎 Extrinsic

🞎 Tendon injury – specify the tendon:

🞎 Tendinopathy Tendon rupture: 🞎Partial 🞎 Complete

🞎 Ligament injury – specify the ligament:

🞎ACL 🞎PCL 🞎 MCL 🞎LCL

🞎Sprain Rupture: 🞎Partial

🞎Complete

🞎Other injuries – specify:____________________________________________________________________________

**What treatments were used**? 🞎 Physical therapy 🞎 Surgery

**Use of isokinetics in rehabilitation**: 🞎 Yes 🞎 No

**How does the player rate their recovery in current activity**?

🞎 Very good 🞎 Good 🞎 Average 🞎 Poor

**Circumstances of the injury:**

🞎 With contact 🞎Without contact

**Game phase**:

🞎Running 🞎 Kicking 🞎 Tackling 🞎 Ruck/maul

🞎 Other: specify

**Time of injury**:

🞎Warm-up 🞎1st quarter 🞎 2nd quarter 🞎 3rd quarter 🞎4th quarter

**Field condition**: 🞎 Hard 🞎Normal 🞎Muddy 🞎Soaked

**What was the player's position at the time of injury?** (indicate with a number from 1 to 15) _________________________________________________________________________________________________

**Time interval between the injury and the isokinetic evaluation in this stud**y? (in weeks) _____________________________________________________________________________________________

**What tests were performed for diagnosis?** (check all that apply)

🞎Clinical exam 🞎 CT scan

🞎X-rays 🞎Arthro-CT

🞎 Ultrasound 🞎 MRI

🞎Other, specify: ___________________________________________________________________

**What criteria were used to resume sport?** (check all that apply)

🞎Clinical exam

🞎Imaging, specify: _____________________________________________________________

🞎 Field tests

🞎Isokinetic evaluation
